# Supplementary material for: Efficient conversion of human induced pluripotent stem cells into microglia by defined transcription factors
Source: PubMed Central journal article supplement — Stem Cell Reports. 2021 Apr 8;16(5):1363–80. doi: 10.1016/j.stemcr.2021.03.010 (PMC8185376; doi:10.1016/j.stemcr.2021.03.010), 2021-04-08
Supplement: mmc1.pdf [file mmc1.pdf]

**Stem Cell Reports, Volume 16**

**Supplemental Information**

**Efficient conversion of human induced pluripotent stem cells into microglia by defined transcription factors**

**Shih-Wei Chen, Yu-Sheng Hung, Jong-Ling Fuh, Nien-Jung Chen, Yeh-Shiu Chu, Shu-Cian Chen, Ming-Ji Fann, and Yu-Hui Wong**

**A**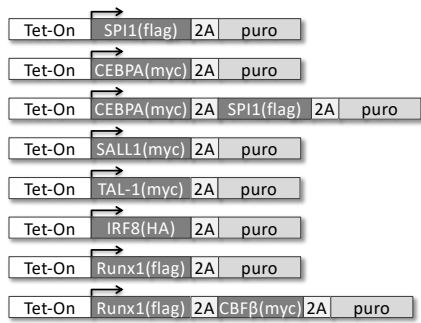

| Predicted protein     | Amino acids (a.a.)/<br>molecular weight (kD)# |
|-----------------------|-----------------------------------------------|
| SPI1(flag)            | 305/35.0                                      |
| CEBPA(myc)            | 268/28.7                                      |
| CEBPA(myc) SPI1(flag) | 266/28.4 311/35.7                             |
| SALL1(myc)            | 1353/143.6                                    |
| TAL1(myc)             | 360/37.4                                      |
| IRF8(HA)              | 454/51.4                                      |
| RUNX1(flag)           | 507/54.8                                      |
| RUNX1(flag) CBFβ(myc) | 508/54.9 223/26.0                             |

# M.W. predicted by SnapGene software

**B**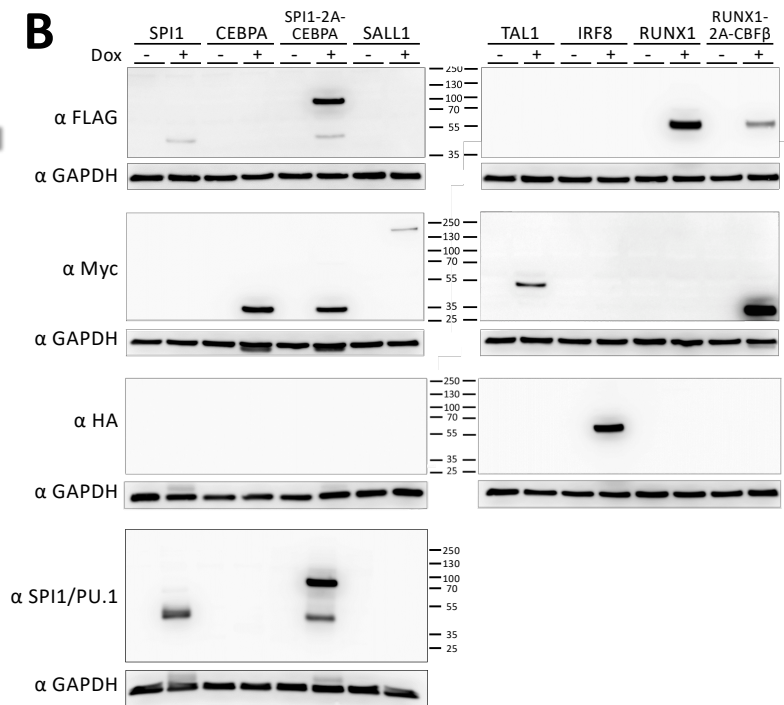**C**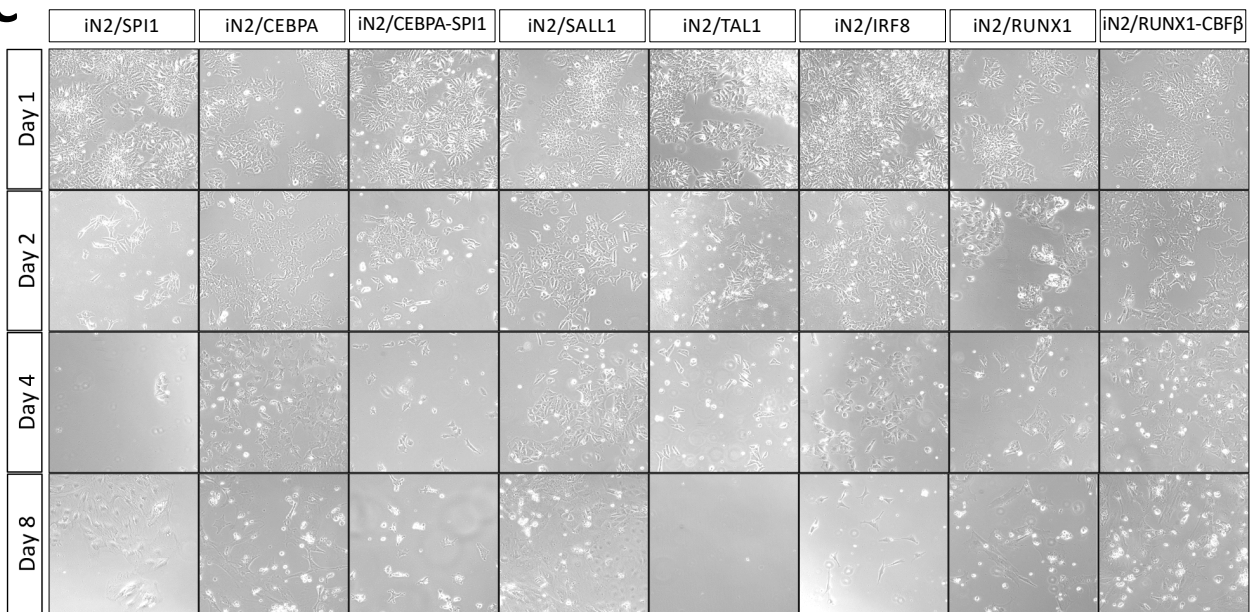

100 μm

**D**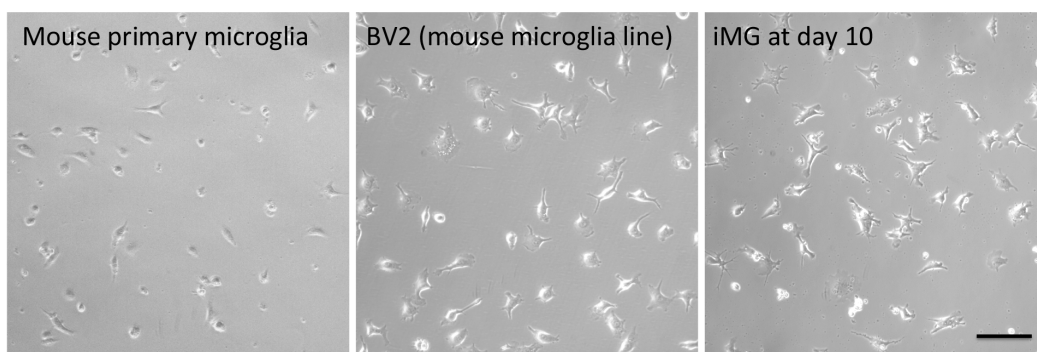

100 μm

**Figure S1. Induction of microglia-like cells from human iPSCs. Related to Figure 1.**

(A) Eight constructs were constructed that expressed the candidate transcription factors involved in defining microglial cell fate during embryogenesis; the choice was based on a review of the literature. The expected molecular weights (MWs) of the expressed proteins are shown in right panels. (B) N2-iPSCs were transduced with lentivirus expressing both rtTA and one of the tetO promoter-driven pro-microglial gene linked with puromycin resistant by T2A. Expression of each pro-microglial genes was induced using doxycyclin on day 0. Puromycin selection for 24 hr was started on day 1, and lysates of the surviving cells were harvested on day 3. These lysates were then subjected to Western blotting using anti-flag, myc or HA antibodies. GAPDH was used as a loading control. (C) Representative phase contrast images that display the morphological changes of N2-iPSCs after induction with the various different candidate genes on days 1, 2, 4 and 8. Scale bar, 100  $\mu$ m. (D) Induced microglia on day 10 (right panel) show a microglia-like morphology that resembles that of mouse primary microglia (left panel) and the BV2 cell line (middle panel). Scale bar, 100  $\mu$ m.

**A**

| Time | Procedure                   | Medium*        |            |                   |                |
|------|-----------------------------|----------------|------------|-------------------|----------------|
|      |                             | Standard       | No factors | Longer transition | No GM-CSF      |
| -1   | Virus infection             | E8             | E8         | E8                | E8             |
| 0    | Add Dox                     | Activin A (20) |            | Activin A (20)    | Activin A (20) |
| 1    | Puro selection              | BMP4 (50)      |            | BMP4 (50)         | BMP4 (50)      |
|      |                             | FGF2 (20)      |            | FGF2 (20)         | FGF2 (20)      |
| 2    | Remove Puro                 | SCF (50)       |            | SCF (50)          | SCF (50)       |
|      |                             | VEGF (50)      |            | VEGF (50)         | VEGF (50)      |
| 3    |                             | IL-34 (10)     |            | FGF2 (20)         | IL-34 (10)     |
|      |                             | M-CSF (10)     |            | SCF (50)          | M-CSF (10)     |
|      |                             | TGFβ1 (10)     |            | VEGF (50)         | TGFβ1 (10)     |
| 4    |                             |                |            | IL-34 (10)        |                |
|      |                             |                |            | M-CSF (10)        |                |
|      |                             |                |            | TGFβ1 (10)        |                |
| 5    |                             |                |            | IL-34 (100)       |                |
|      |                             |                |            | M-CSF (20)        |                |
|      |                             |                |            | TGFβ1 (20)        |                |
| 6    |                             |                |            | IL-34 (100)       |                |
|      |                             |                |            | M-CSF (20)        |                |
|      |                             |                |            | TGFβ1 (20)        |                |
| 9    | CD11b/TREM2 (flow analysis) |                |            | IL-34 (100)       |                |
|      |                             |                |            | M-CSF (20)        |                |
|      |                             |                |            | TGFβ1 (20)        |                |

\* β-ME (50 μM) is added on days 0-2.

\* Dox (1 μg/mL) is added on days 0-9.

**B**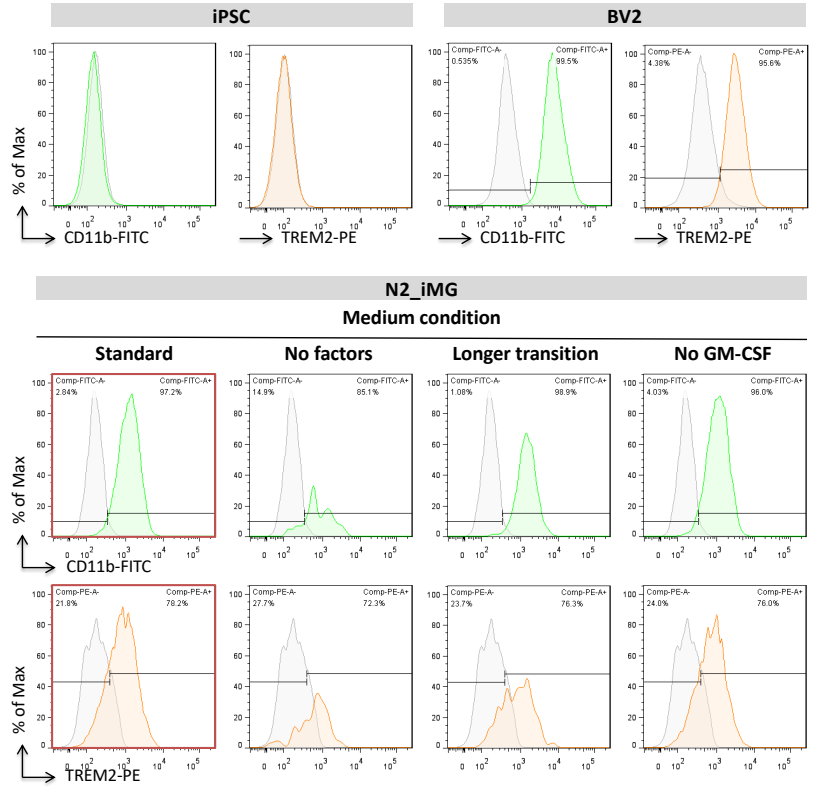**C**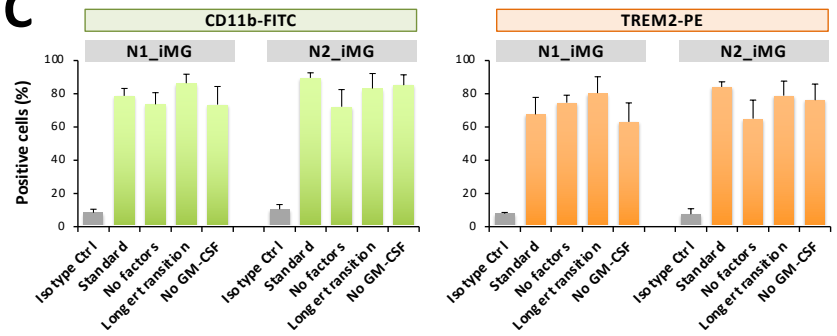**D**

| Time | Procedure             | Medium         |   |   |   |   |
|------|-----------------------|----------------|---|---|---|---|
|      |                       | Standard       | A | B | C | D |
| -1   | Virus infection       | E8             |   |   |   |   |
| 0    | Add Dox               | Activin A (20) |   |   |   |   |
| 1    | Puro selection        | BMP4 (50)      |   |   |   |   |
|      |                       | FGF2 (20)      |   |   |   |   |
| 2    | Remove Puro           | SCF (50)       |   |   |   |   |
|      |                       | VEGF (50)      |   |   |   |   |
| 3    |                       | IL-34 (10)     |   |   |   |   |
|      |                       | M-CSF (10)     |   |   |   |   |
|      |                       | TGFβ1 (10)     |   |   |   |   |
| 4    |                       |                |   |   |   |   |
|      |                       |                |   |   |   |   |
|      |                       |                |   |   |   |   |
| 5    |                       |                |   |   |   |   |
|      |                       |                |   |   |   |   |
|      |                       |                |   |   |   |   |
| 6    |                       |                |   |   |   |   |
|      |                       |                |   |   |   |   |
|      |                       |                |   |   |   |   |
| 9    | CD11b (flow analysis) |                |   |   |   |   |
|      |                       |                |   |   |   |   |
|      |                       |                |   |   |   |   |

**E**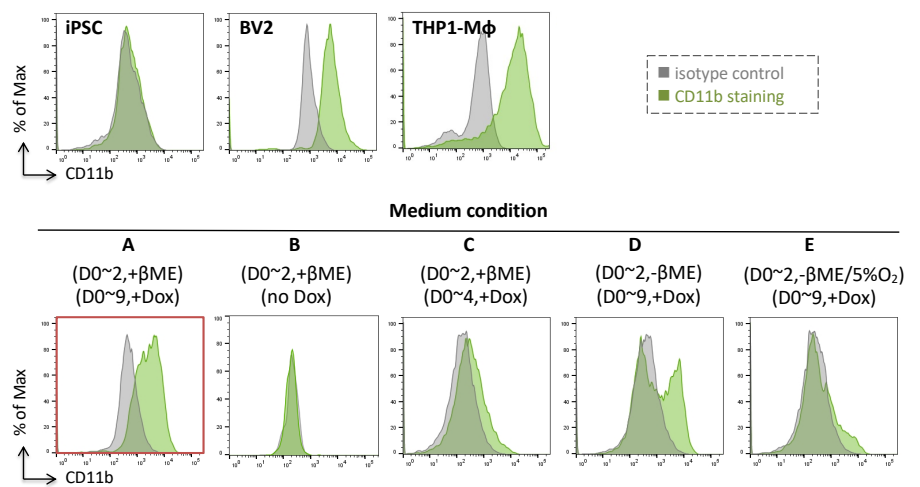

**Figure S2. Identification of the basal media and growth factors required for induction and differentiation of microglia-like cells from human iPSCs.**

(A) Various growth factors were tested to determine whether they brought about iMG cell induction and differentiation. The numbers in parenthesis indicate the concentration of human recombinant proteins used in ng/ml. (B) Flow cytometry analyses showing CD11b and TREM2 expression in cells grown in the four different medium listed in (A). Green, CD11b antibody conjugated to FITC; orange, TREM2 antibody conjugated to PE; gray, isotype control. (C) Quantification of the CD11b<sup>+</sup> or TREM2<sup>+</sup> positive cells present among N2-iMGs cultured in the different medium. Data are presented as means  $\pm$  SEM (n = 4 batches of independent differentiation). (D) Various basal media, with different duration of treatment of  $\beta$ -mercaptoethanol ( $\beta$ -ME) and doxycycline (Dox), were tested to determine whether they brought about iMG cell induction and differentiation. The numbers in parenthesis indicate the concentration of human recombinant proteins used in ng/ml. (E) Flow cytometry analyses showing CD11b expression in cells grown in the five different medium A-E listed in (D). The greatest number of CD11b<sup>+</sup> cells were present under the condition identified by the red frame and therefore we used these induction conditions for all follow-up experiments. Green, CD11b antibody conjugated to FITC; gray, isotype control. The figure is representative of three-independent experiments (n = 3).

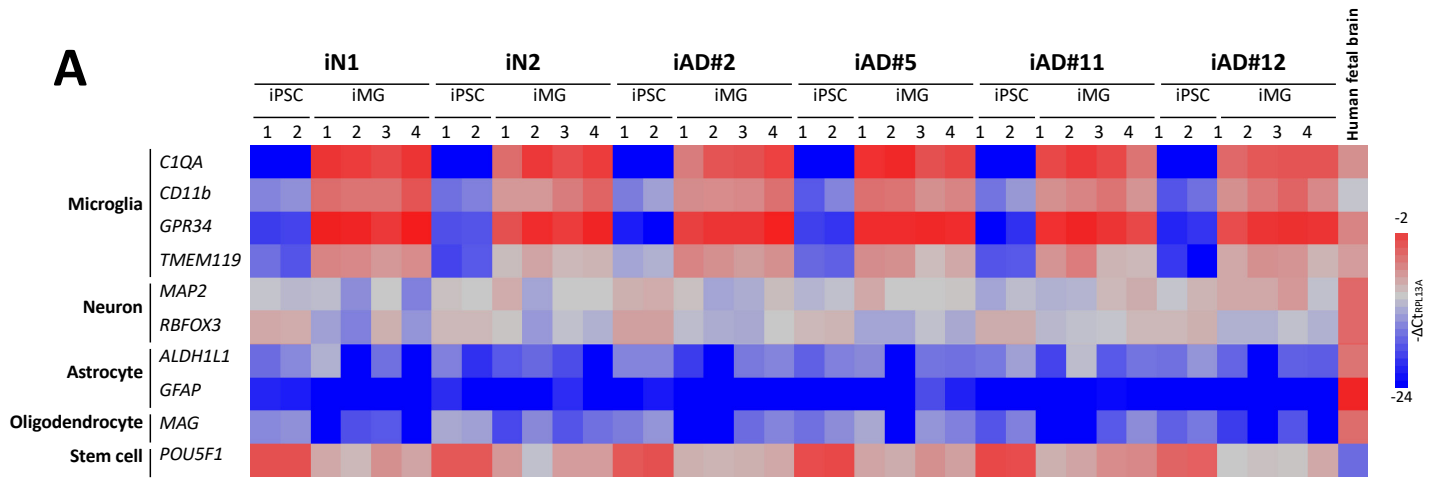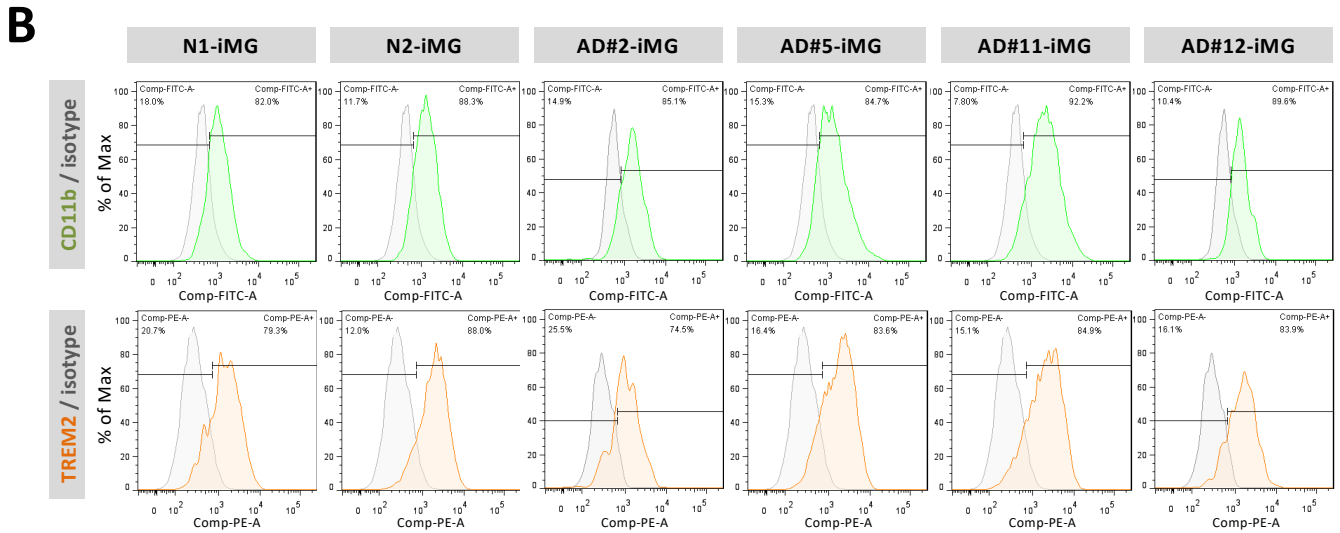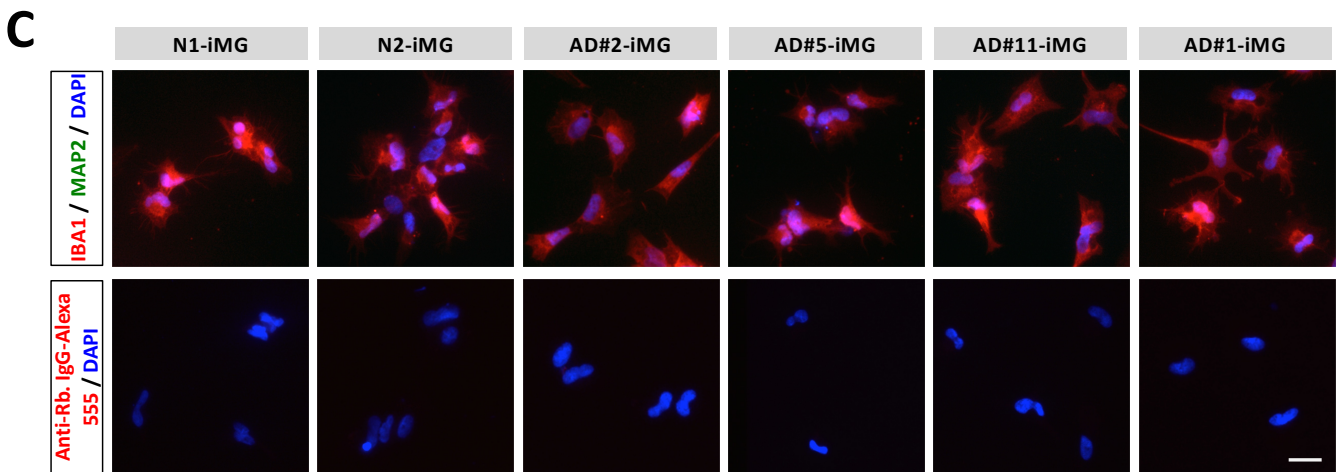

**Figure S3. Differentiation of six hiPSC lines into microglia-like cells. Related to Figure 2.**

(A) Comparative heatmap depiction of differential gene expression of iPSCs and iMGs differentiated from six iPSC lines using real-time RT-PCR. iPSC and iMG group contained two and four independent experiments, respectively. Levels of the gene expression indicated on the left side of the panel are normalized to RPL13A mRNA levels as an internal control. (B) Flow cytometry analyses showing the expression of microglial surface markers, CD11b and TREM2, in six iPSC line-derived iMG cells after 9 days of differentiation. Green, CD11b antibody conjugated to FITC; orange, TREM2 antibody conjugated to PE; gray, isotype control. The figure is representative of three-independent experiments (n = 5). (C) Representative images of 6 lines of iMG cells immunostained for microglia and neuronal markers, IBA1 and MAP2, respectively. Scale bar, 20  $\mu\text{m}$ .

**A**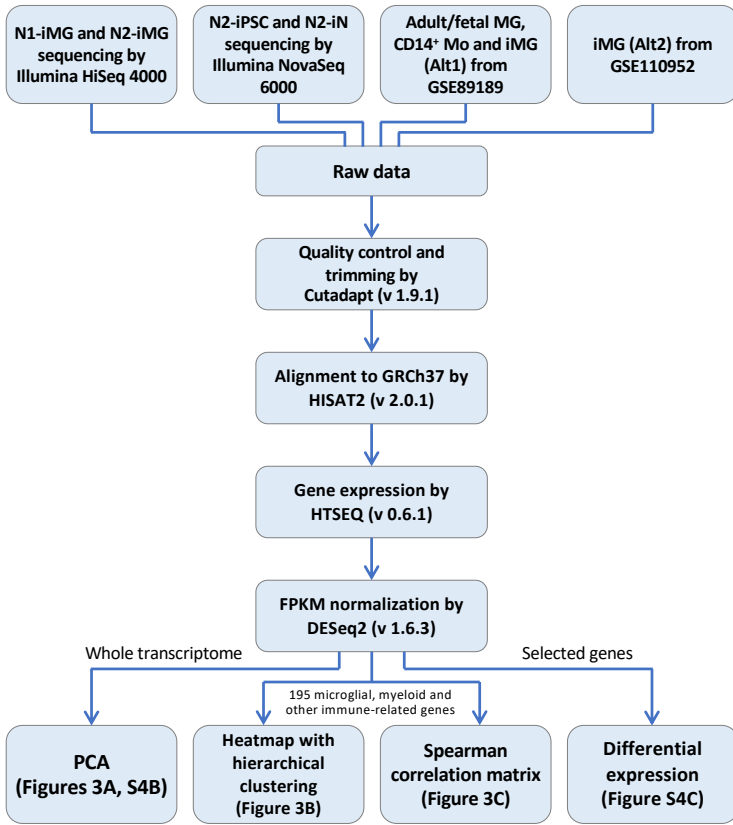**B**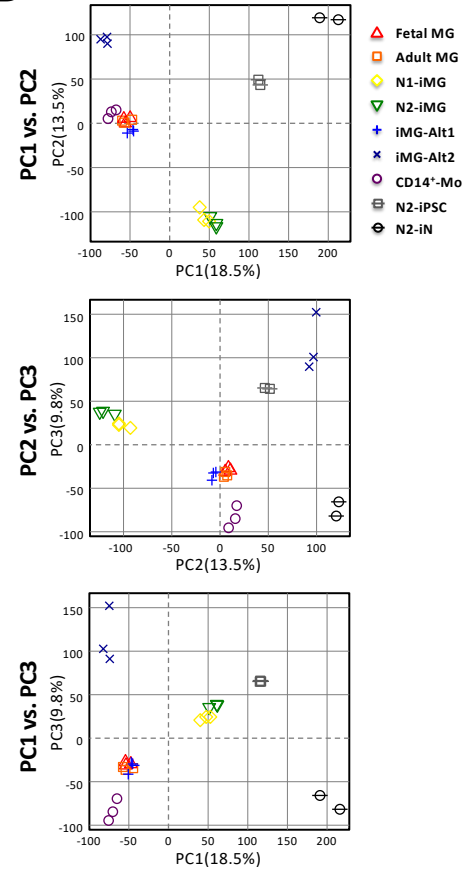**C**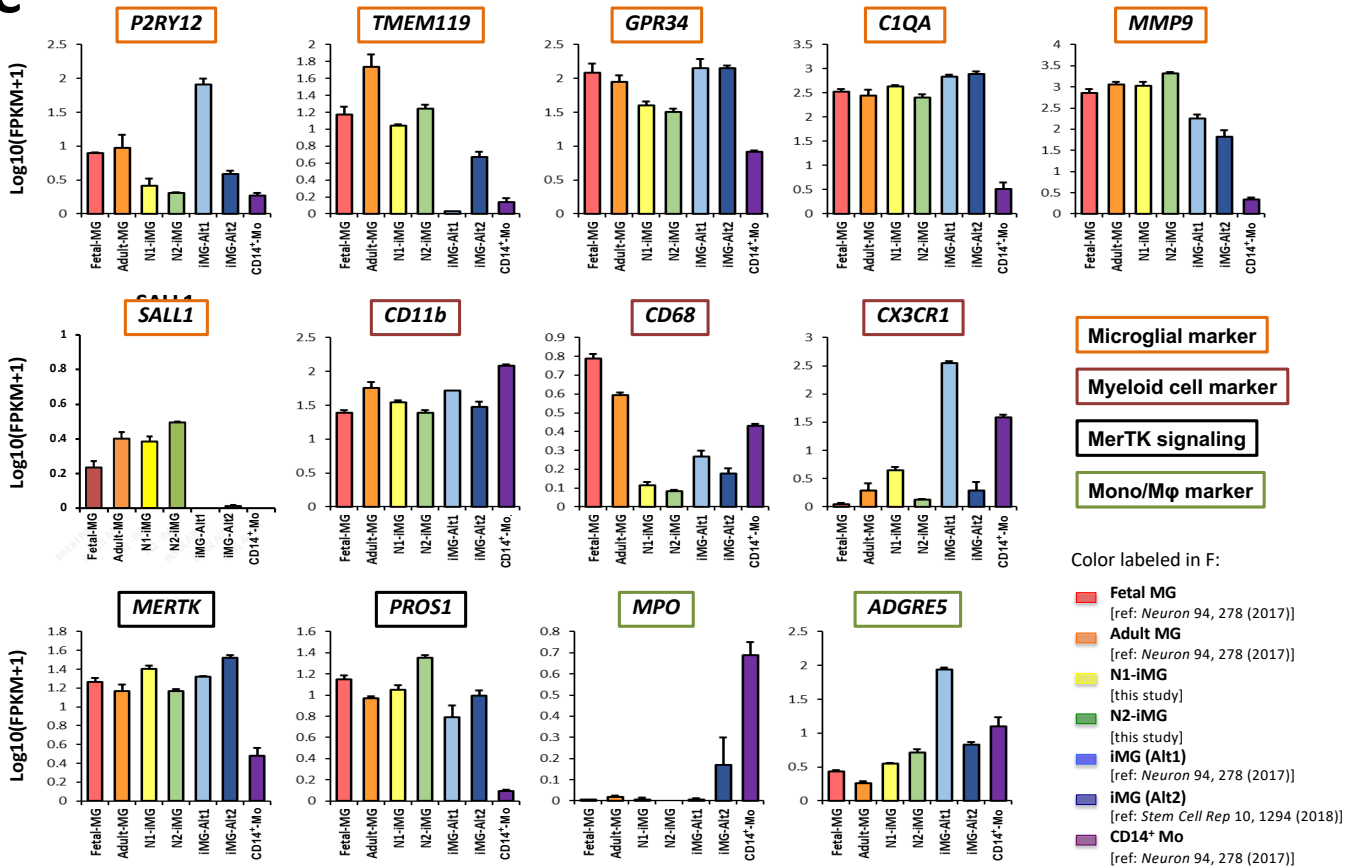



**Figure S4. RNA-seq analysis. Related to Figure 3.**

(A) Workflow of RNA-seq analysis. (B) PCA analysis of different cells by whole transcriptome sequencing of protein coding gene expression. (C) Bar graphs of the expression of various microglia-specific genes, as well as other myeloid genes, in D11-12 iMG cells, fetal MG cells, adult MG cells, iMG cells obtained by two other methods [iMG (Alt1) and iMG (Alt2)], and CD14+ peripheral blood monocytes shown as  $[\text{Log}_{10}(\text{FPKM} + 1)]$ . These results were derived from the RNA-seq results and are presented as mean  $\pm$  SEM (n = 3 RNA-seq data sets).

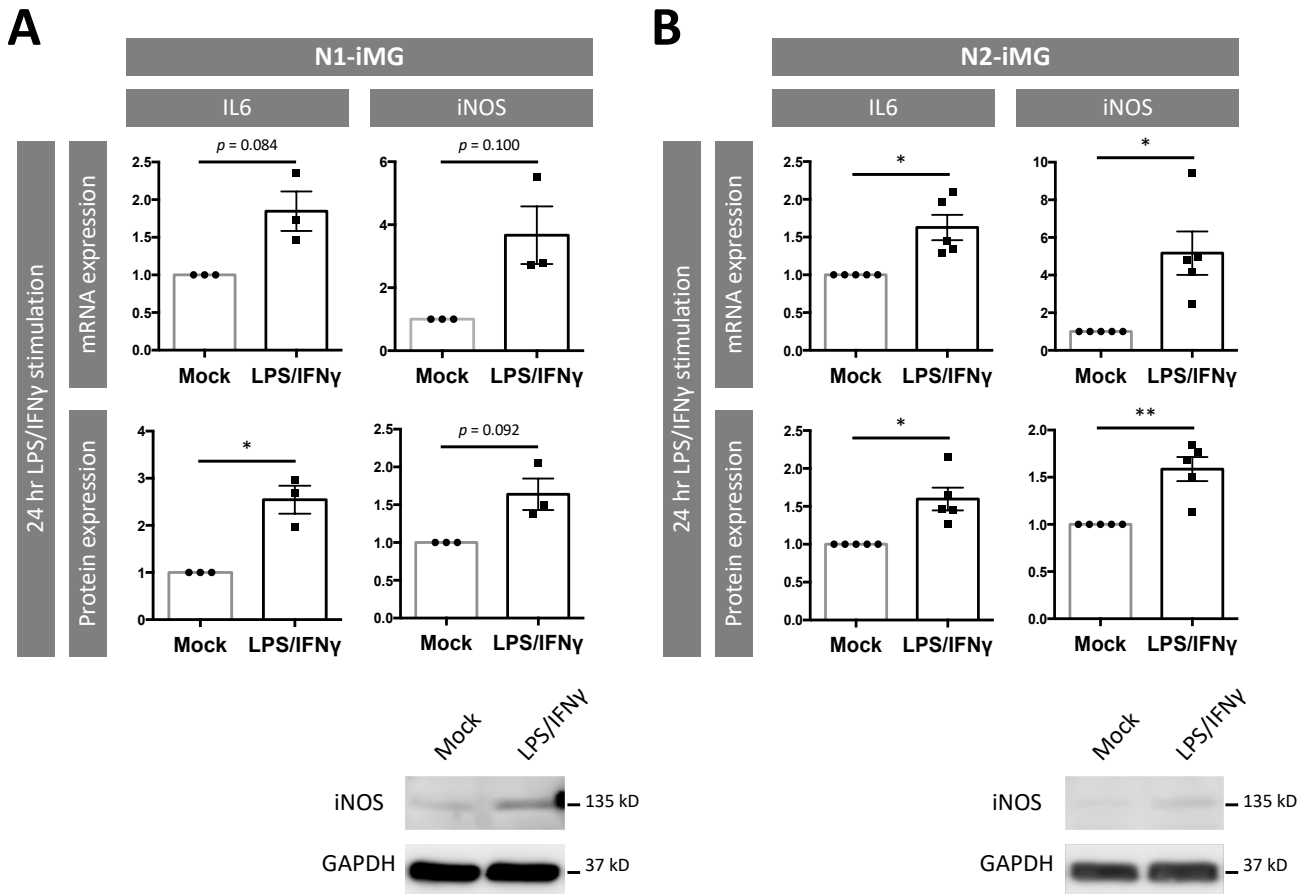

**Figure S5. iMG cells exhibit appropriate physiological responses to LPS and IFN $\gamma$  challenge. Related to Figure 4.**

Analyses of inflammation-related gene expression at mRNA and protein levels in N1-iMG (A) and N2-iMG (B) cells after LPS (100 ng/mL) and IFN $\gamma$  (20 ng/mL) stimulation for 24 hr. IL6 protein in supernatant was detected by ELISA. iNOS protein in cells was analyzed by western blotting. Data are presented as means  $\pm$  SEM (n = 3 and 5 independent differentiations for N1-iMG and N2-iMG, respectively). \* $p < 0.05$ , \*\* $p < 0.01$  when compared to mock-treatment group by the ratio paired  $t$ -test.

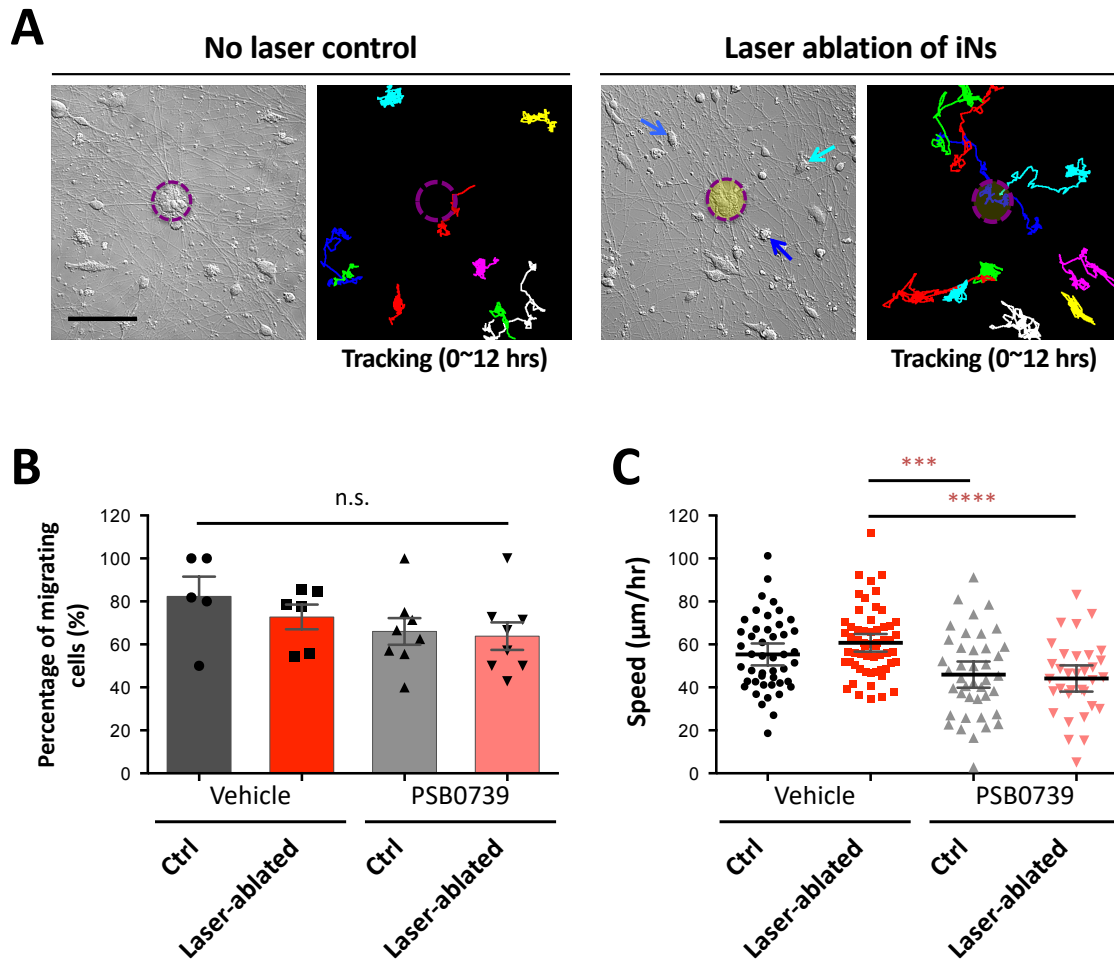

**Figure S6. iMG cells respond to and migrate toward an injured neuron cluster. Related to Figure 7, Movies S6 and S7.**

(A) An example of the time-lapse imaging of co-cultures with or without laser-induced neuronal injury. The 405-nm laser light was first applied to the region of interest (magenta circles) for 5 min, and the time-lapse DIC imaging was recorded for 12 hours. Blue arrows in the DIC images mark iMG cell migrating towards the central iN cluster. The images on the right panel show the result of cell traces, which are presented as a color-coded trajectory for each cell over the 12-hr recording time. Scale bar, 100  $\mu\text{m}$ . (B) The percentage of migrating iMG cells in the control or laser-ablation group over a 12-hr recording period. Data are presented as means  $\pm$  SEM ( $n = 5-8$  independent fields in each group). n.s., not significant by one-way ANOVA. (C) The speed of migration of the iMG cells in the control or laser-ablation group over a 12-hr recording period. Data are presented as means  $\pm$  SEM ( $n = 33-58$  cells from 5-8 fields in each group). \*\*\* $p < 0.001$ , \*\*\*\* $p < 0.0001$  by one-way ANOVA with Tukey's multiple comparisons.

## Supplemental Movies

**Movie S1.** A representative image of 3D reconstruction of iMG phagocytosis of latex beads (red). The plasma membrane and nuclei of the live cells were stained with CellMask deep red (green) and Hoechst 33342 (blue), respectively. Scale bar, 10  $\mu\text{m}$ . (Related to Figure 4B)

**Movie S2.** A representative image of 3D reconstruction of iMG phagocytosis of TAMRA-labeled fibrillar A $\beta$  (fA $\beta$ , red). The plasma membrane and nuclei of the live cells were stained with CellMask deep red (green) and Hoechst 33342 (blue), respectively. Scale bar, 10  $\mu\text{m}$ . (Related to Figure 4C)

**Movie S3.** An example of the time-lapse DIC imaging of iMG cultures recorded for 12 hours. Scale bar, 50  $\mu\text{m}$ . (Related to Figure 6D)

**Movie S4.** An example of the time-lapse DIC imaging of iMG cultures with iNs recorded for 12 hours. Scale bar, 50  $\mu\text{m}$ . (Related to Figure 6D)

**Movie S5.** The cell death of iNs was monitored using propidium iodide (PI, red) staining. Scale bar, 20  $\mu\text{m}$ . (Related to Figure 7B)

**Movie S6.** An example of the time-lapse DIC imaging of iMG-iN co-cultures without laser-induced neuronal injury. Scale bar, 50  $\mu\text{m}$ . (Related to Figure 7C)

**Movie S7.** An example of the time-lapse DIC imaging of iMG-iN co-cultures with laser-induced neuronal injury in the selected region (magenta circles). Scale bar, 50  $\mu\text{m}$ . (Related to Figure 7C)

## Supplemental Tables

**Table S1. iMG differentiation efficiency using different combination of TFs. Related to Figure 1.**

### S1-1. Flow cytometry with anti-CD11b antibody

|                       | CD11b+ (%<br>mean ± SEM) | Replicate<br>(independent<br>diff., n) |
|-----------------------|--------------------------|----------------------------------------|
| Isotype Ctrl (N.C.)*  | 2.84 ± 1.42              | 5                                      |
| BV2 (P.C.)#           | 82.70 ± 5.35             | 5                                      |
| iN2/SPI1 <sup>§</sup> | 6.06 ± 0.97              | 5                                      |
| iN2/SPI1;CEBPA        | 58.43 ± 6.94             | 4                                      |
| iN2/SPI1;IRF8         | 7.56 ± 0.77              | 3                                      |
| iN2/SPI1;IRF8;TAL1    | 6.09 ± 0.99              | 3                                      |
| iN2/SPI1;RUNX1        | 6.58 ± 0.87              | 3                                      |
| iN2/SPI1;SALL1        | 7.22 ± 1.14              | 3                                      |
| iN2/SPI1;TAL1         | 7.83 ± 1.15              | 3                                      |
| iN2/RUNX1             | 6.19 ± 2.05              | 5                                      |
| iN2/RUNX1;CBFβ        | 4.47 ± 1.19              | 3                                      |
| iN2/RUNX1;IRF8        | 8.77 ± 3.19              | 3                                      |
| iN2/RUNX1;TAL1        | 7.46 ± 1.77              | 3                                      |
| iN2/SALL1             | 8.63 ± 1.25              | 5                                      |
| iN2/SALL1;IRF8        | 8.37 ± 2.29              | 3                                      |
| iN2/SALL1;RUNX1       | 10.60 ± 3.80             | 3                                      |
| iN2/SALL1;TAL1        | 7.23 ± 1.34              | 3                                      |
| iN2/CEBPA             | 5.42 ± 0.74              | 3                                      |
| iN2/IRF8              | 6.03 ± 0.54              | 5                                      |
| iN2/TAL1              | 5.41 ± 0.35              | 5                                      |
| iN2/TAL1;IRF8         | 7.92 ± 2.25              | 3                                      |

\* BV2 labeled with FITC conjugated rat IgG2b kappa antibody (isotype control) was used as negative control (N.C.).

# BV2 labeled with FITC conjugated anti-CD11b antibody was used as positive control (P.C.).

§ iN2 (hiPSC line) extopically expressing the indicated transcription factors (TFs).

### S1-2. Immunocytochemistry with anti-IBA1 antibody

|                             | IBA1+ (%<br>mean ± SEM) | Replicate<br>(independent<br>diff., n) |
|-----------------------------|-------------------------|----------------------------------------|
| 2 <sup>nd</sup> Ab (N.C.)** | 0                       | 7                                      |
| BV2 (P.C.)                  | 95.42 ± 1.58            | 7                                      |
| iN2/SPI1                    | 2.55 ± 1.72             | 7                                      |
| iN2/SPI1;CEBPA              | 75.90 ± 3.74            | 7                                      |
| iN2/SPI1;IRF8               | 0                       | 3                                      |
| iN2/SPI1;IRF8;TAL1          | 0                       | 3                                      |
| iN2/SPI1;RUNX1              | 0                       | 3                                      |
| iN2/SPI1;SALL1              | 0                       | 3                                      |
| iN2/SPI1;TAL1               | 0                       | 3                                      |
| iN2/RUNX1                   | 0                       | 4                                      |
| iN2/RUNX1;CBFβ              | 0                       | 7                                      |
| iN2/RUNX1;IRF8              | 0                       | 3                                      |
| iN2/RUNX1;TAL1              | 0                       | 3                                      |
| iN2/SALL1                   | 0                       | 6                                      |
| iN2/SALL1;IRF8              | 0                       | 3                                      |
| iN2/SALL1;RUNX1             | 0                       | 3                                      |
| iN2/SALL1;TAL1              | 0                       | 3                                      |
| iN2/CEBPA                   | 0                       | 3                                      |
| iN2/IRF8                    | 0.01 ± 0.01             | 6                                      |
| iN2/TAL1                    | 0                       | 4                                      |
| iN2/TAL1;IRF8               | 0                       | 3                                      |

\*\* BV2 labeled with 2<sup>nd</sup> antibody was used as negative control (N.C.).

**Table S2. The primers and TaqMan® probes for qPCR analysis. Related to Figures 3, 4 and 6.**

| Gene         | Forward primer (5' - 3') | Reverse primer (5' - 3')  | Probe |
|--------------|--------------------------|---------------------------|-------|
| ADGRE5       | ACGCATGAAGCTGAATTGG      | GTTCTGGATGGAGAGGATGC      | #78   |
| ALDH1L1      | CGGTGGGGGAAGATCAGT       | ATCCAGGGCCTCAATGGT        | #63   |
| C1QA         | GAGCATCCAGTTGGAGTTGAC    | ACACAGAGCACCAGCCAT        | #13   |
| CD11B        | GGCTCTGCTTCCTGTTTGG      | GGCAATGTCACTATCCTCTTGA    | #66   |
| CD68         | CCTCAGCTTTGGATTCATGC     | GAGCCGAGAATGTCCACTGT      | #67   |
| CX3CR1       | CCCTGGAAGGTGCTGTTATC     | TCCATGAGATTGGACTGGAA      | #60   |
| GFAP         | AGAGGGACAATCTGGCACA      | CAGCCTCAGGTTGGTTTCAT      | #29   |
| GPR34        | CGGTGAAAGGTTGCGACTAT     | GGTCGCTATGATTGGTTATAAAGC  | #52   |
| IL-6         | GATGAGTACAAAAGTCCTGATCCA | CTGCAGCCACTGGTTCTGT       | #40   |
| INOS         | ATTCAGCTGTGCCTTCAACC     | CATTGCCAAACGTA CTGGTC     | #66   |
| ITGAL        | GCTGAGAGCCAGATGATCG      | GAGCACTCCACTTCATGCAC      | #78   |
| MAG          | CCTTCAACCTGTCTGTGGAGTT   | CGGGTTGGACTTCACCAC        | #63   |
| MAP2         | CCTGTGTTAAGCGGAAAACC     | AGAGACTTTGTCCTTTGCCTGT    | #62   |
| MMP9         | GAACCAATCTCACCGACAGG     | GCCACCCGAGTGTAACCATA      | #6    |
| MPO          | CGTCAACTGCGAGACCAG       | GTCATTGGGCGGGATCTT        | #66   |
| P2RY12       | TGACAAAAATCCAGGGTAGTGA   | CGTCAGTAAAGTCTTGAGTGCTCTT | #17   |
| POU5F1(OCT4) | CTTCGCAAGCCCTCATTTT      | GAGAAGGCGAAATCCGAAG       | #60   |
| RBFOX3(NEUN) | CCCTCCGACCCTACAGAGA      | CCACGTCTAAAATTTTTCCGAAT   | #66   |
| RPL13A       | CAAGCGGATGAACACCAAC      | TGTGGGGCAGCATACCTC        | #28   |
| TNF $\alpha$ | CAGCCTCTTCTCCTTCCTGAT    | GCCAGAGGGCTGATTAGAGA      | #29   |
| TMEM119      | AGTCCTGTACGCCAAGGAAC     | AGGAGCAGCAACAGAAGGAT      | #75   |

**Table S3. List of 195 selected microglia/monocyte/macrophage-related genes (Bennett et al., 2016; Dong et al., 2013) in clustering heatmap. Related to Figure 3.**

|          |          |         |              |        |         |         |          |
|----------|----------|---------|--------------|--------|---------|---------|----------|
| ABCG1    | CD6      | EIF2S1  | HLA-A        | JUNB   | NFE2    | RUNX1   | TGFB1    |
| ABHD15   | CD7      | ELMO1   | HLA-B        | KCNK6  | NFKBIZ  | SALL1   | TGFBR1   |
| ACP2     | CDKN2D   | ENTPD1  | HLA-C        | KCTD11 | NKG7    | SERINC3 | TLR9     |
| ACVR1    | CEBPD    | EPB42   | HLA-DOA      | KLF4   | NOTCH2  | SFT2D1  | TMEM106A |
| ADAM8    | CFH      | EPSTI1  | HLA-DPB1     | KLHL21 | NR4A2   | SFT2D2  | TMEM119  |
| ADI1     | CLEC4A   | ETV5    | HLA-DQA2     | LAG3   | NUMB    | SIRPA   | TMEM14C  |
| AIF1     | CLEC4D   | F11R    | HLA-DQB1-AS1 | LAP3   | NXF1    | SLC15A3 | TMEM163  |
| AKT3     | CMTM6    | FAM102B | HLA-DRB9     | LDHB   | OLFML2B | SLC17A9 | TMEM185B |
| ANG      | CMTM7    | FAM105A | HLA-E        | LIPN   | OLR1    | SLC39A1 | TMEM204  |
| APOL3    | CNR2     | FAM110A | HLA-H        | LMAN1  | OPHN1   | SLC40A1 | TMEM258  |
| APP      | COMMD8   | FAM91A1 | ICAM3        | LYPD3  | ORAI1   | SLC46A1 | TMEM55B  |
| ARHGAP12 | COMMD9   | FCAR    | IDO1         | MAP2   | P2RY6   | SLC46A2 | TNFAIP3  |
| ASB2     | COMT     | FCGR1B  | IFI44L       | MAPK1  | PAX6    | SLC7A7  | TNFRSF17 |
| ASGR2    | CR1L     | FCGR1C  | IGJ          | MB21D2 | POLR2G  | SLC7A8  | TNFSF10  |
| ATRAID   | CRIP1    | FMNL1   | IL10         | MERTK  | PPARG   | SMOX    | TP53     |
| BIN1     | CRISPLD2 | FSCN1   | IL1A         | MMP9   | PROS1   | SOX2    | TSPAN3   |
| BLNK     | CRYBB1   | G6PC3   | IL6R         | MN1    | PTAFR   | SPARC   | TSPAN7   |
| BTG1     | CSF1R    | GAPDH   | IRF7         | MPI    | PTGS2   | SRGAP2  | UBASH3B  |
| C1QA     | CSF2RB   | GAPT    | ITGA6        | MPO    | RARA    | STK17B  | ZFP36    |
| C9orf72  | CXCL16   | GBP4    | ITGA9        | MX2    | RCAN1   | STX11   | ZSWIM4   |
| CASP8    | CYB5A    | GBP5    | ITGAM        | MYLIP  | RGL1    | SYNGR1  |          |
| CBFB     | CYB5B    | GNLY    | ITGB2        | NDUFA3 | RGS2    | TANC2   |          |
| CCL4     | DCTPP1   | GOLM1   | ITGB5        | NDUFA7 | RHOB    | TARDBP  |          |
| CD164    | DNAJB4   | GPR157  | ITM2B        | NDUFC2 | RIPK2   | TBCB    |          |
| CD276    | DYNLRB1  | HFE     | ITPRIPL1     | NECAP1 | RPS27L  | TGFA    |          |

**Table S4. Antibodies used in this study.**

| Antibodies (flow cytometry) | Host Species | Target Species | Vendor         | Cat. No.   | Dilution |
|-----------------------------|--------------|----------------|----------------|------------|----------|
| Human BD Fc Block           | N/A          | Human          | BD Biosciences | 564220     | 1:20     |
| CD11b-FITC                  | Rat          | Human, Mouse   | BioLegend      | 101206     | 1:100    |
| TREM2-PE                    | Rat          | Human, Mouse   | R&D Systems    | FAB17291P  | 1:50     |
| Isotype control-FITC        | Rat          | N/A            | invitrogen     | 11-4031-82 | 1:100    |
| Isotype control-PE          | Rat          | N/A            | invitrogen     | 12-4031-82 | 1:50     |

| Antibodies (immunofluorescent staining) | Host Species | Target Species         | Vendor     | Cat. No.  | Dilution |
|-----------------------------------------|--------------|------------------------|------------|-----------|----------|
| IBA1                                    | Rabbit       | Human, Mouse, Rat, etc | Wako       | 019-19741 | 1:1000   |
| MAP2                                    | Mouse        | Human, Mouse, Rat, etc | Millipore  | AB5622    | 1:1000   |
| FLAG                                    | Rabbit       | N/A                    | SIGMA      | F7425     | 1:1000   |
| MYC                                     | Mouse        | Human                  | SIGMA      | M5546     | 1:1000   |
| Mouse-Alexa 488                         | Goat         | Mouse                  | Invitrogen | A11001    | 1:500    |
| Rabbit-Cy5                              | Goat         | Rabbit                 | Invitrogen | A10523    | 1:500    |

| Antibodies (western) | Host Species | Target Species         | Vendor      | Cat. No.  | Dilution |
|----------------------|--------------|------------------------|-------------|-----------|----------|
| FLAG                 | Rabbit       | N/A                    | SIGMA       | F7425     | 1:5000   |
| MYC                  | Mouse        | Human                  | SIGMA       | M5546     | 1:5000   |
| HA                   | Mouse        | N/A                    | SIGMA       | H9658     | 1:5000   |
| iNOS                 | Rabbit       | Human, Mouse           | Invitrogen  | PA3-030A  | 1:1000   |
| PU.1                 | Rabbit       | Human                  | Abcam       | ab76543   | 1:3000   |
| GAPDH                | Mouse        | Human, Mouse, Rat, etc | proteintech | 60004-1   | 1:10000  |
| Mouse-HRP            | Goat         | Mouse                  | Bethyl      | A90-216P  | 1:5000   |
| Rabbit-HRP           | Goat         | Rabbit                 | Bethyl      | A120-201P | 1:5000   |

| Chemicals for nucleus staining | Vendor | Cat. No. | Dilution |  |  |
|--------------------------------|--------|----------|----------|--|--|
| DAPI                           | SIGMA  | D9542    | 1:1000   |  |  |
| Propidium iodide               | SIGMA  | P-4170   | 1:1000   |  |  |



## Supplemental Experimental Procedures

### *Cell culture*

The two human induced pluripotent stem cell (hiPSC) lines, NTUH-iPSC-01-05 and NTUH-iPSC-02-02 (abbreviated to iN1 and iN2, respectively), were purchased from Bioresource Collection and Research Center of Food Industry Research and Development Institute, Taiwan. The four AD-iPSC lines were generated by the Brain Research Center of National Yang-Ming University, Taiwan using non-integrating Sendai virus (Wu et al., 2019) and are available to other researchers via Biobank of Taipei Veterans General Hospital, Taiwan. The uses of these hiPSC lines followed the Policy Instructions of the Ethics of Human Embryo and Embryonic Stem Cell Research guidelines in Taiwan. In addition, approval from the Institutional Review Boards of National Yang-Ming University was obtained. Human iPSCs were routinely maintained in Essential 8™ (E8) medium (Gibco, USA) on vitronectin (VTN-N, Gibco, USA) coated dishes at 37°C in a 5% CO<sub>2</sub> incubator. Cells were passaged when the culture reached 85% confluency, typically every 4 days. For passaging, the hiPSCs were washed once with Dulbecco's Phosphate-Buffered Saline (DPBS) without calcium and magnesium (Gibco) and then treated with DPBS/EDTA (0.5 mM UltraPure EDTA in DPBS) for 3-4 minutes at 37°C. When the cells started to separate and round up, they were removed from the dish by gently pipetting. An appropriate number of cells was then transferred to a new culture dish at a passaging ratio of 1:10.

The mouse microglial cell line BV2 and human embryonic kidney 293FT (HEK293FT) cells were maintained in Dulbecco's modified Eagle medium (DMEM, Gibco) containing 10% fetal bovine serum (FBS, Biological Industries, USA) and 1% penicillin-streptomycin-glutamine (PSG, Gibco) at 37°C in a 5% CO<sub>2</sub> incubator. Medium was renewed every two days or when the medium had begun to turn yellow. Cells were passaged upon reaching 85% confluency, typically every 4 days. For subculture, the cells were washed once with DPBS together with TrypLE™ express enzyme (Gibco). When the cells started to separate and round up, they were removed from the dish by gently pipetting. The passaging ratio was routinely 1:10.

The human monocytic cell line THP-1 was maintained in suspension using RPMI-1640 medium (Gibco) containing 10% FBS and 1% PSG at 37°C in a 5% CO<sub>2</sub> Incubator. Fresh medium was added every two days or when the medium began to turn yellow. Cells were subcultured every 4 days by centrifugation and then resuspended at  $1.5 \times 10^5$  viable cells/ml. To induce the THP-1 monocytes to turn into macrophages,  $1.5 \times 10^6$  cells were seeded into a 10-cm Petri dish containing serum free RPMI-1640 medium supplemented with 10 ng/ml phorbol 12-myristate 13-acetate (PMA, Sigma) for 6 hours. After cells had attached to the Petri-dish, the medium was replaced with fresh RPMI-1640 containing 10% FBS and 1% PSG. These cells were regarded as M0 macrophages and then subjected to further analyses.

### *Lentiviral plasmid construction*

The lentiviral vector backbone pTetO-Ngn2-puro was a gift from Marius Wernig (Addgene plasmid #52047). The open reading frames of human SPI1, SALL1, TAL1, IRF8 and RUNX1 were amplified from various constructs by PCR to include flanking EcoRI and XbaI sites. The open reading frame of CBFβ was amplified from the RNA of THP-1 by RT-PCR to include flanking SbfI and XbaI sites. The open reading frame of CEBPA was amplified from the THP-1 RNA by RT-PCR to include flanking EcoRI and XbaI sites, or flanking EcoRI and SbfI sites with a T2A linking peptide sequence. SPI1, SALL1, TAL1, IRF8, RUNX1 and CEBPA were introduced to the EcoRI and XbaI sites of the pTetO-T2A-Puro backbone. CBFβ was introduced to SbfI and XbaI sites of the pTetO-RUNX1-T2A-Puro backbone to generate the pTetO-RUNX1-T2A-CBFβ-T2A-Puro construct. CEBPA was introduced to EcoRI and SbfI sites of pTetO-SPI1-T2A-Puro backbone to generate the pTetO-CEBPA-T2A-SPI1-T2A-Puro construct. The integrity of the vector was verified by restriction enzyme digestion, and the correct sequence of inserted fragment was confirmed by Sanger sequencing.

### *Lentivirus generation and infection*

HEK293FT cells were seeded at  $5 \times 10^6$  cells in a 10-cm dish and incubated overnight. Cells were co-transfected with 6 μg of lentiviral construct with 5 μg of the packaging plasmid pCMV-Δ8.91 and 1 μg of the envelope plasmid pVSV-G; this was done using Lipofectamine 3000 (Invitrogen) by following the manufacturer's instructions. Two batches of virus-containing supernatant were collected at 24 and 72 hours after transfection. The viral supernatant was filtered through a 0.45-μm filter (low protein binding) to remove cell debris and then concentrated 20 fold using an Amicon Ultra-15 Centrifugal Filter Unit (MWCO 3 kDa,

Merck). The virus concentrates were separated into aliquotes of 100 µl and stored at -80°C until use. hiPSCs were seeded in 12-well plate one day before infection and should be exhibiting 50% to 60% confluence at the time of transduction. For infection, the culture was replaced with fresh medium containing the appropriate lentivirus and 8 µg/ml polybrene. Twenty-four hours after infection, the infection medium was replaced with the fresh E8 medium. All experiments using infected hiPSCs were started after two passages to allow cell adaptation.

#### *Differentiation of microglia-like cells from hiPSCs*

HiPSCs that had been infected with both FUW-rtTA and pTetO-CEBPA-T2A-SPI1-T2A-Puro were seeded on day -1. On day 0, the cells had reached at least 70% confluency; at this point the culture medium was replaced with DMEM/F12 (Gibco) supplemented with N2 (Gibco) and non-essential amino acids (NEAA, Gibco). The medium also contained human bone morphogenic protein-4 (BMP4, 50 ng/ml, PeproTech), basic fibroblast growth factor (bFGF/FGF2 50 ng/ml, PeproTech) and activin-A (20 ng/ml, PeproTech). Doxycycline (2 µg/ml, Sigma) was added to promote TetO downstream gene expression and retained in the medium until the end of the experiment. On day 1, the medium was replaced with DMEM/F12/N2/NEAA containing human vascular endothelial growth factor (VEGF, 50 ng/ml, PeproTech), stem cell factor / KIT ligand (SCF, 50 ng/ml, PeproTech) and FGF2 (20 ng/ml). Puromycin (1 µg/ml, Gibco) was also added for 24 hours to select for successfully infected cells. On day 2, the medium was replaced with DMEM/F12/N2/NEAA containing human IL-34 (10 ng/ml, PeproTech), macrophage colony-stimulating factor (M-CSF, 10 ng/ml, PeproTech) and transforming growth factor-β 1 (TGFβ-1, 10 ng/ml, PeproTech). Two days later, the medium was replaced with DMEM/F12/N2/NEAA containing human IL-34 (100 ng/ml), M-CSF (20 ng/ml) and TGFβ-1 (20 ng/ml). After day 4, half medium was removed and replaced with fresh DMEM/F12/N2/NEAA containing human IL-34 (100 ng/ml), M-CSF (20 ng/ml), granulocyte M-CSF (GM-CSF, 20 ng/ml, PeproTech) and TGFβ-1 (20 ng/ml); this was repeated every 3 days from this point onwards. Cells were assayed on days 9, day 12 or day 15 in most experiments (Figure S10).

#### *Differentiation of neuronal cells from hiPSCs*

HiPSC-derived neurons were generated using a published protocol (Zhang et al., 2013) with modifications. HiPSCs that had been infected with FUW-rtTA and pTetO-Ngn2-puro were seeded on day -1. On day 0, when the cells reached at least 70% confluency, the culture medium was replaced with DMEM/F12 supplemented with N2, NEAA, human brain-derived neurotrophic factor (BDNF, 10 ng/ml, PeproTech), human neurotrophin-3 (NT-3, 10 ng/ml, PeproTech) and mouse laminin (0.2 µg/ml, Gibco). Doxycycline (2 µg/ml) was added to induce TetO-regulated Ngn2 expression and retained in the medium until the end of the experiment. On day 1, puromycin (1 µg/ml) was added to kill any uninfected cells. On day 2, puromycin was removed and the cells were replated in Neurobasal medium supplemented with B-27 supplement (Gibco), GlutaMAX (Gibco), mouse laminin (0.2 µg/ml), human BDNF (10 ng/ml) and NT-3 (10 ng/ml) on poly-L-lysine and laminin coated dishes (~10<sup>5</sup> cells/mL). On day 4, cytosine arabinoside (Ara-C, 2 µM, Sigma) was added to the medium to inhibit non-neuronal cell proliferation and was then removed on day 6. After day 6, 50% of the medium was changed every 4 days. Induced neurons were assayed between days 14 to 20 in most experiments.

#### *Co-culture of hiPSC-derived microglia-like (iMG) cells and neurons (iNs)*

For co-culture, the iNs and iMGs were cultured separately as described above until day 4. After day 4, the two cells were co-cultured under a set of conditions suitable for both iNs and iMG cells. Briefly, iMG cells were detached from plate with EDTA. Next 1x10<sup>5</sup> iMG cells were gently seeded onto the monolayer of a neuronal culture in DMEM/F12/N2/B27/NEAA/GlutaMAX that contained IL-34 (100 ng/ml), M-CSF (20 ng/ml), TGFβ-1 (20 ng/ml), BDNF (10 ng/ml), NT3 (10 ng/ml) and doxycycline (2 µg/mL). Half medium was changed for fresh DMEM/F12/N2/B27/NEAA/GlutaMAX containing human IL-34 (100 ng/ml), M-CSF (20 ng/ml), GM-CSF (20 ng/ml), TGFβ-1 (20 ng/ml), BDNF (10 ng/ml), NT3 (10 ng/ml) and doxycycline (2 µg/mL) every 3 days (Figure S10). For the comparison of gene expression, the iMG cells cultured alone or in co-culture was isolated by the positive selection of CD11b<sup>+</sup> cells using an immunomagnetic separation kit (Miltenyi Biotec), according to the manufacturer's instruction, and then subjected to RT-qPCR.

#### *Western blotting*

The infected hiPSCs after 3-days of doxycycline treatment and 1-day of puromycin selection were

lysed in RIPA buffer (50 mM Tris-HCl, pH 8.0, 150 mM NaCl, 1% Nonidet P-40 (NP-40), 1% sodium deoxycholate and 0.1% SDS) supplemented with protease inhibitor cocktail (Roche). Lysate (20 µg) was separated by electrophoresis on 10% SDS-polyacrylamide gel in tricine-glycine buffer and transferred to a polyvinylidene difluoride (PVDF) membrane (Millipore). The membrane was blocked with 5% skimmed milk in PBST (137 mM NaCl, 2.7 mM KCl, 10 mM Na<sub>2</sub>HPO<sub>4</sub>, 1.8 mM KH<sub>2</sub>HPO<sub>4</sub> and 0.1% Tween-20) and then incubated with primary antibody solution at 4°C overnight. After washing with PBST, the membrane was incubated with horseradish peroxidase (HRP)-conjugated secondary antibody for 1 hr at room temperature. After washing again with PBST, the signals were developed using Immobilon Western Chemiluminescent HRP substrate (Millipore) and detected using a LAS3000 imaging system (Fujifilm, Japan). All antibodies and dilutions used in Western blotting are listed in Table S4.

#### *Immunocytochemistry*

The cells cultured on coverslips were fixed with 4% paraformaldehyde (PFA) in PBS (137 mM NaCl, 2.7 mM KCl, 10 mM Na<sub>2</sub>HPO<sub>4</sub>, 1.8 mM KH<sub>2</sub>HPO<sub>4</sub>, pH 7.2-7.4) at room temperature for 10 minutes and then made permeable with 0.1% Triton X-100 in PBS for 5 minutes. Next the cells were blocked using PBS containing 3% bovine serum albumin (BSA, Sigma) and 3% goat serum (Gibco) at room temperature for 1 hour and then the appropriate primary antibodies were applied at the indicated concentrations (Table S4) overnight at 4°C. Next the cells were washed in PBS three times and incubated with the appropriate secondary antibody and DAPI at room temperature for 2 hours. After washing, the coverslips were mounted in the Fluoromount-G solution (Invitrogen). The fluorescent images were acquired using a Zeiss Axio Observer inverted microscope fitted with an Andor Zyla CMOS camera. All images were then processed using ImageJ software (NIH, Bethesda, MD, USA, <https://imagej.nih.gov/ij>) (Schneider et al., 2012). All antibodies and dilutions used in immunocytochemistry are listed in Table S4.

#### *Flow cytometry*

Cells were dissociated with EDTA into a single cell suspension and then blocked with Human Fc Block (BD Biosciences, USA) on ice for 20 minutes. For detection of microglial surface markers, the cells were incubated with pre-conjugated anti CD11b-FITC (M1/70, 1:100, BioLegend), anti CX3CR1 (C-X3-C motif chemokine receptor 1)-Alexa Fluor 647 (1:20, BioLegend), anti TREM2 (triggering receptor expressed on myeloid cells 2)-PE (1:50, R&D Systems) or isotype control antibodies (1:50, BioLegend) for 30 minutes at 4°C, washed twice with FACS buffer (DPBS with 1% FBS and 0.1% sodium azide), resuspended in propidium iodide (PI) containing FACS buffer and then analyzed using a BD FACSCanto analyzer. The results were further analyzed using FlowJo software. Briefly, the cells were first gated for PI-negative (for live cells) and proper FSC and SSC signals, and then the signals of gated cells were analyzed in the FITC (525/40 nm) and PE (585/42 nm) filters.

#### *Magnetic activated cell sorting (MACS)*

The iMG cells for RNA sequencing and in co-culture were isolated by the positive selection of CD11b<sup>+</sup> cells using an immunomagnetic separation kit (Miltenyi Biotec), according to the manufacturer's instructions. The cells isolated by the MACS method were washed twice with PBS and then quickly processed for RNA isolation.

#### *RNA isolation and RT-qPCR analysis*

Total RNA was isolated using a Tissue Total RNA Mini Kit (Geneaid, Taiwan) by following the manufacturer's instructions. In-column DNase I digestion was performed to remove genomic DNA contamination. Reverse transcription was then performed using Superscript IV (Invitrogen) and Oligo(dT)<sub>20</sub> primers by following the manufacturer's instructions. The cDNA was stored at -20°C until used for qPCR analysis. TaqMan Real-time polymerase chain reactions (PCRs) were carried out using FastStart Universal Probe Master Mix (ROX) (Roche) and the StepOnePlus™ real-time PCR system (Thermo Fisher Scientific). Primers were intron-spanning and designed using the *Universal ProbeLibrary Assay Design Center* (Roche). The primers and probes for the qPCR analysis are listed in Table S2.

#### *RNA sequencing*

Total RNA from each sample was extracted using a Total RNA Mini Kit (Geneaid) and then quantified and its purity assessed using an Agilent 2100 Bioanalyzer (Agilent Technologies, Palo Alto, CA, USA),

NanoDrop (Thermo Fisher Scientific) and by electrophoresis on 1% agarose gels, respectively. Next, 1 µg of total RNA with a RIN value above 7 was used to prepare the appropriate libraries. Next generation sequencing library preparation was constructed according to the manufacturer's protocol (NEBNext® Ultra™ RNA Library Prep Kit for Illumina®). The poly(A) mRNA isolation was performed using either a NEBNext Poly(A) mRNA Magnetic Isolation Module (NEB) or a Ribo-Zero™ rRNA removal Kit (illumina). The mRNA fragmentation and priming was performed using NEBNext RNA First Strand Synthesis Reaction Buffer and NEBNext Random Primers. First strand cDNA was synthesized using ProtoScript II Reverse Transcriptase and the second-strand cDNA was synthesized using Second Strand Synthesis Enzyme Mix. The purified double-stranded cDNA obtained by AxyPrep Mag PCR Clean-up (Axygen) was then treated with End Prep Enzyme Mix to repair both ends and add a dA-tail; this was done in a single reaction, and was followed by a T-A ligation to add adaptors to both ends. Size selection of Adaptor-ligated DNA was then performed using AxyPrep Mag PCR Clean-up (Axygen), and fragments of ~360 bp (with the approximate insert size being 300 bp) were recovered. Each sample was then amplified by PCR for 11 cycles using the P5 and P7 primers, with both primers carrying sequences that are able to anneal with the flow cell in order to perform bridge PCR and P7 primer carrying a six-base index allowing for multiplexing. The PCR products were cleaned up using AxyPrep Mag PCR Clean-up (Axygen), validated using an Agilent 2100 Bioanalyzer (Agilent Technologies, Palo Alto, CA, USA), and quantified by Qubit 2.0 Fluorometer (Invitrogen, Carlsbad, CA, USA). Then libraries with different indices were multiplexed and loaded on an Illumina instrument according to manufacturer's instructions (Illumina, San Diego, CA, USA). N1-iMG and N2-iMG libraries were sequenced using the Illumina HiSeq 4000 system; N2-iPSC and N2-iN libraries were sequenced using the Illumina NovaSeq 6000 system. Sequencing was carried out using a 2x150bp paired-end (PE) configuration; image analysis and base calling were conducted by the Control Software (HCS) + OLB + GAPipeline-1.6 (Illumina) on the instrument. The RNA sequencing (RNA-seq) was processed and analyzed by GENEWIZ (South Plainfield, NJ, USA).

#### *Transcriptome analysis*

To compare the transcriptome profile of our iMGs with that of human primary microglia to support the microglial identity, RNA-seq data for human adult microglia, human fetal primary microglia, CD14<sup>+</sup> monocytes and iPSC-derived microglia obtained using other differentiation protocols were retrieved from NCBI GEO (GSE89189 and GSE110952) (Abud et al., 2017; Brownjohn et al., 2018). Reads from the datasets of GSE89189 and GSE110952 were mapped and counted using the same methods and databases as for our data. Briefly, reads were first mapped to a reference genome of human (GRCh37; hg19) using HISAT2 (version 2.0.1). Per-gene expression levels (read counts) were quantitated using HTSEQ (v 0.6.1), and the fragments per kilobase of transcript per million mapped reads (FPKM) was calculated by the formula "total exon fragments / (mapped reads [millions] x exon length [KB])". FPKM from different experiments was then normalized using Median of ratios method (DESeq2, v 1.6.3). Principal component analysis, heatmap with hierarchical clustering and Spearman correlation matrix were performed using R version 3.1.2. The workflow of RNA-seq data analysis is shown in Figure S5A. The data discussed in this publication have been deposited in NCBI's Gene Expression Omnibus (Edgar et al., 2002) and the accessible through GEO Series accession number GSE163984 (<https://www.ncbi.nlm.nih.gov/geo/query/acc.cgi?acc=GSE163984>).

#### *Inflammation assay*

The iMG culture medium on days 9-12 was replaced with basal media without IL34, M-CSF, GM-CSF and TGF-β for 6 hr, and then the cells were stimulated with lipopolysaccharides (LPS, 100 ng/ml, Sigma) and interferon γ (IFNγ, 20 ng/ml, PeproTech) for 6 or 24 hr. Next the conditioned medium (CM) was harvested and centrifuged in the presence of the protease inhibitor cocktail (Roche) and stored at -80°C until analysis. IL6 protein in CM was measured via a sensitive fluorescence based sandwich enzyme-linked immunosorbent assay (ELISA) that used a kit (Biolegend). The detailed procedure was performed according to the manufacturer's protocol. The cell lysates were prepared with RB buffer (Geneaid), and total RNA from either the mock treatment or the LPS/IFN-γ treatment was collected and assessed by RT-qPCR for expression of inflammatory genes.

#### *Phagocytosis assay*

Aqueous red-orange fluorescent latex beads (Sigma) were pre-opsonized in 50% FBS/DPBS at 37°C for 1 hr. Fibrillar fluorescent amyloid-beta (TAMRA-fAβ) was generated as described previously (Stine et al., 2011). Briefly, fluorescently labeled Aβ1-42 peptide (AnaSpec, Fremont, CA, USA) was first dissolved in

NH<sub>4</sub>OH (0.1%) to 1 mg/ml, further diluted to 100 µg/ml using sterile endotoxin-free water, vortexed thoroughly, and incubated at 37°C for 7 days. TAMRA-fAβ was thoroughly mixed prior to cell exposure. For the phagocytosis assay, cells were pre-exposed to DMSO, cytochalasin (10 µM, Sigma) or Mer THR inhibitor (UNC569, 10 µM, Sigma) for 1 hr and further incubated with either pre-opsonized latex beads (20 microns per cell) or TAMRA-fAβ (5 µM) for 1 hr. Next they were washed twice with DPBS/1% FBS to remove the remaining extracellular latex beads or TAMRA-fAβ. Samples were then labeled with FITC-conjugated anti-CD11b antibody and analyzed using a BD FACSCanto analyzer (BD Biosciences, USA). The results were further analyzed using FlowJo software (FlowJo, Ashland, OR, USA). The cells were first gated for PI-negative (for live cells) and proper FSC and SSC signals, and then the signals of CD11b and subtracts (latex beads or TAMRA-fAβ) were detected in the FITC (525/40 nm) and PE (585/42 nm) filters, respectively.

#### *Calcium imaging analysis*

For calcium imaging, iMG cells, pre-exposed to DMSO or PSB0739 (50 µM, Tocris) for 1 hr, were incubated with 5 µM Fura-2/AM (Molecular Probes) calcium dye in loading buffer (150 mM NaCl, 5 mM glucose, 10 mM HEPES, 1 mM MgCl<sub>2</sub>, 5 mM KCl and 2 mM CaCl<sub>2</sub> at pH 7.4) at 37°C for 30 minutes. After incubation, the dye was washed out three times using loading buffer before the cells were used for experiments. The baseline Ca<sup>2+</sup> signal was measured for 5 min and then either adenosine 5'-diphosphate (ADP, 50 µM, Sigma) or adenosine 5'-triphosphate (ATP, 100 µM, Sigma) were introduced as a steady flow after the baseline measurement. The fast switching excitation wavelengths of 340 nm and 380 nm were provided by a monochromator (Polychrome IV, TILL Photonics GmbH Gräfelfing, Germany), and fluorescence images were acquired through a CCD camera (Micromax YHS1300, Roper Scientific, Trenton, NJ, U.S.A.) attached to a fluorescence microscope (IX70, Olympus, Tokyo, Japan) at a sampling rate of 0.5 Hz. The monochromator, CCD camera, and image acquisition were controlled by MetaFluor (Molecular Devices, Downingtown, PA, USA). Data analysis was performed using ImageJ software (NIH, Bethesda, MD, USA).

#### *Transwell migration assay*

iMG cells (5.5x10<sup>4</sup> cells/well) were pre-exposed to DMSO or PSB0739 for 1 hr at 37°C in 5% CO<sub>2</sub> cell culture incubator. The cells were then washed three times with basal medium and added to the inner compartment of a FluoroBlok™ Transwell chamber (8 µm polycarbonate inserts in 24 wells; Corning) containing either ADP (50 µM) or ATP (100 µM) in the bottom chamber. The transwells were then incubated at 37°C in a 5% CO<sub>2</sub> incubator. After 6 hrs, the cells were washed three times with PBS and fixed in 4% PFA for 15 min at room temperature. Next the cells were stained with DAPI for 10 min in order to visualize nuclei of cells. Fluorescent images of the cells were captured using a Zeiss inverted microscope fitted with a Andor Zyla CMOS camera. Data analysis was further performed using ImageJ software.

#### *Laser ablation and time-lapse imaging*

iNs and iMGs were co-cultured on PLL/vitronectin/laminin coated 18-mm coverslips from day 4. On days 9-11, the coverslips were transferred to the Ludin Chamber (Life Imaging Services, Swithland) and covered with CO<sub>2</sub>-independent medium (Gibco) supplemented with N2, B27, NEAA, GlutaMAX, PSG, IL-34 (100 ng/ml), M-CSF (20 ng/ml), GM-CSF (20 ng/ml), TGFβ-1 (20 ng/ml), BDNF (10 ng/ml), NT3 (10 ng/ml) and doxycycline (2 µg/mL). Propidium iodide (PI, 1 µM, Sigma) was then added to label the dead cells. For imaging, each selected field contained a clump of 10-20 neuronal (iN) cell bodies; this clump was central to the selected field and was surrounded by iN and iMG cells. For laser ablation, the central neuronal clump was exposed to a 408-nm wavelength laser beam for 5 minutes to induce cell death. To document the responses of iN and iMG cells toward the laser induced cell death, images were acquired using a Nikon inverted microscope with a 20x objective lens over 12 hours with a frame taken every 5 minutes. Cell movement and location was tracked using the Manual Tracking plugin of imageJ. The iMG cells with a migration distance exceeding two cell bodies were defined as migrating iMGs and these were then included into the tracking results. The distances of each iMG cell body relative to the center of its neuronal clumps on each time point were calculated.

#### *Statistics*

Data are shown as means ± SEM. Statistical significance was assessed using *t*-test or one-way ANOVA together with the appropriate *post hoc* test as indicated. All tests were done using GraphPad Prism software (San Diego, CA, USA). Values are indicated in the figures as \* *p* < 0.05, \*\* *p* < 0.01, \*\*\* *p* < 0.001, \*\*\*\* *p* < 0.0001 and n.s. (not significant).

## Supplemental References

- Abud, E.M., Ramirez, R.N., Martinez, E.S., Healy, L.M., Nguyen, C.H.H., Newman, S.A., Yeromin, A.V., Scarfone, V.M., Marsh, S.E., Fimbres, C., *et al.* (2017). iPSC-Derived Human Microglia-like Cells to Study Neurological Diseases. *Neuron* 94, 278-293 e279.
- Bennett, M.L., Bennett, F.C., Liddel, S.A., Ajami, B., Zamanian, J.L., Fernhoff, N.B., Mulinyawe, S.B., Bohlen, C.J., Adil, A., Tucker, A., *et al.* (2016). New tools for studying microglia in the mouse and human CNS. *Proc Natl Acad Sci U S A* 113, E1738-1746.
- Brownjohn, P.W., Smith, J., Solanki, R., Lohmann, E., Houlden, H., Hardy, J., Dietmann, S., and Livesey, F.J. (2018). Functional Studies of Missense TREM2 Mutations in Human Stem Cell-Derived Microglia. *Stem cell reports* 10, 1294-1307.
- Dong, C., Zhao, G., Zhong, M., Yue, Y., Wu, L., and Xiong, S. (2013). RNA sequencing and transcriptomal analysis of human monocyte to macrophage differentiation. *Gene* 519, 279-287.
- Edgar, R., Domrachev, M., and Lash, A.E. (2002). Gene Expression Omnibus: NCBI gene expression and hybridization array data repository. *Nucleic Acids Res* 30, 207-210.
- Stine, W.B., Jungbauer, L., Yu, C., and LaDu, M.J. (2011). Preparing synthetic Abeta in different aggregation states. *Methods in molecular biology* 670, 13-32.
- Zhang, Y., Pak, C., Han, Y., Ahlenius, H., Zhang, Z., Chanda, S., Marro, S., Patzke, C., Acuna, C., Covy, J., *et al.* (2013). Rapid single-step induction of functional neurons from human pluripotent stem cells. *Neuron* 78, 785-798.
- Wu, P.C., Fann, M.J., Tran, T.T., Chen, S.C., Devina, T., Cheng, I.H., Lien, C.C., Kao, L.S., Wang, S.J., Fuh, J.L., *et al.* (2019). Assessing the therapeutic potential of *Graptopetalum paraguayense* on Alzheimer's disease using patient iPSC-derived neurons. *Scientific reports* 9, 19301.
